# Supplementary material for: On required accuracy of mixed noise parameter estimation for image enhancement via denoising
Source: Springer Nature journal article supplement (doi:10.1186/1687-5281-2014-3), 2014-01-14
Supplement: 13640_2013_106_MOESM1_ESM.pdf [file 13640_2013_106_MOESM1_ESM.pdf]

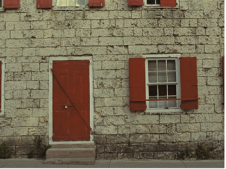

1

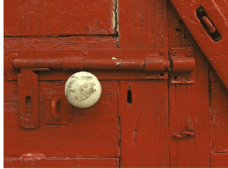

2

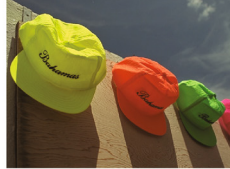

3

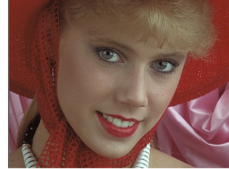

4

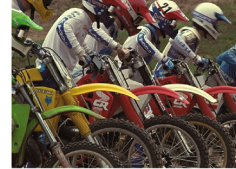

5

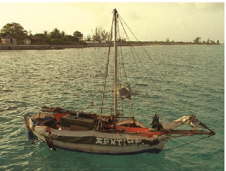

6

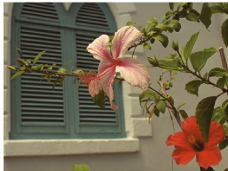

7

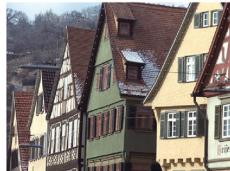

8

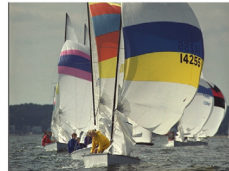

9

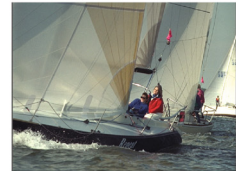

10

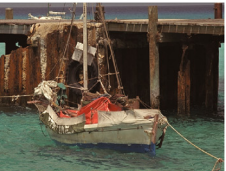

11

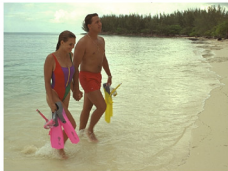

12

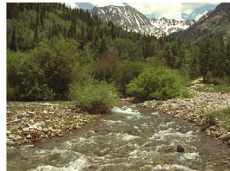

13

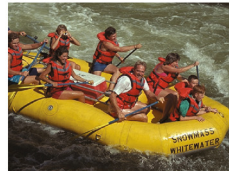

14

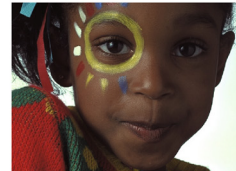

15

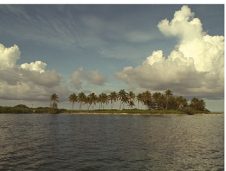

16

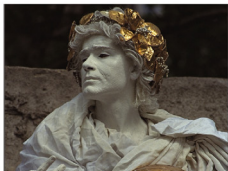

17

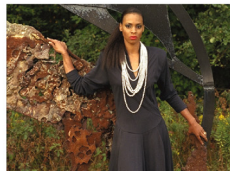

18

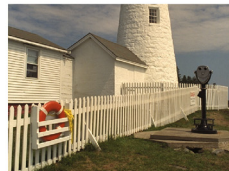

19

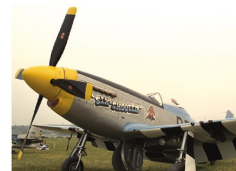

20

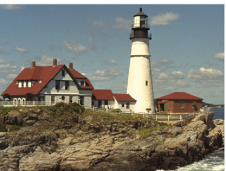

21

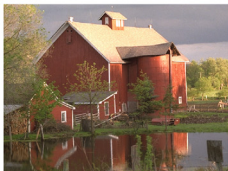

22

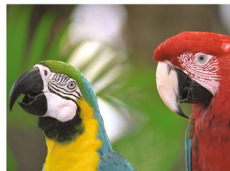

23

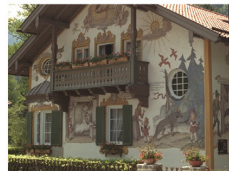

24

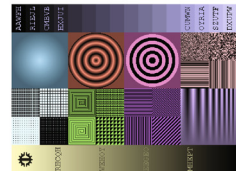

25
