# Supplementary material for: On required accuracy of mixed noise parameter estimation for image enhancement via denoising
Source: Springer Nature journal article supplement (doi:10.1186/1687-5281-2014-3), 2014-01-14
Supplement: 13640_2013_106_MOESM3_ESM.pdf [file 13640_2013_106_MOESM3_ESM.pdf]

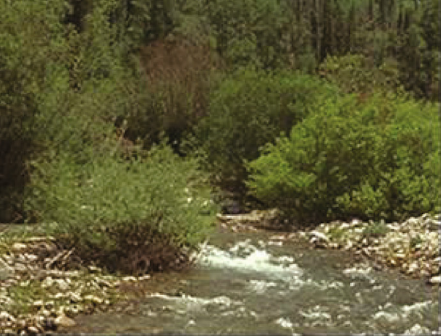

a

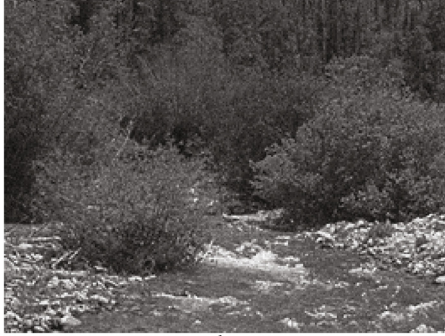

b

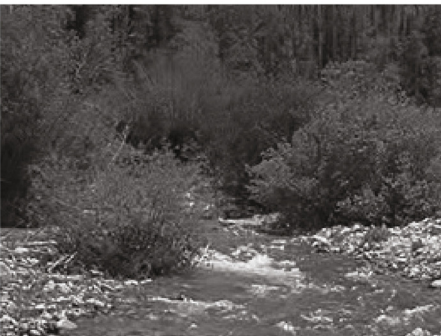

PSNR = 30.99; PSNR-HVS-M = 35.42;  
MSSIM = 0.931

c

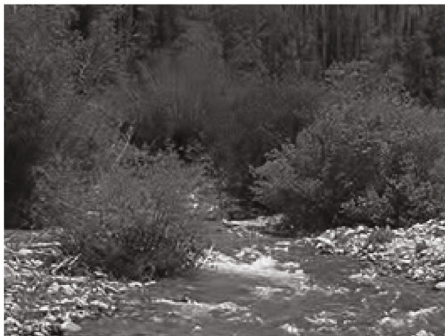

PSNR = 30.53; PSNR-HVS-M = 34.93;  
MSSIM = 0.927

d
