# Supplementary material for: On required accuracy of mixed noise parameter estimation for image enhancement via denoising
Source: Springer Nature journal article supplement (doi:10.1186/1687-5281-2014-3), 2014-01-14
Supplement: 13640_2013_106_MOESM4_ESM.pdf [file 13640_2013_106_MOESM4_ESM.pdf]

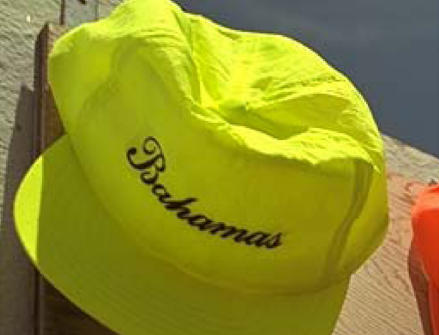

a

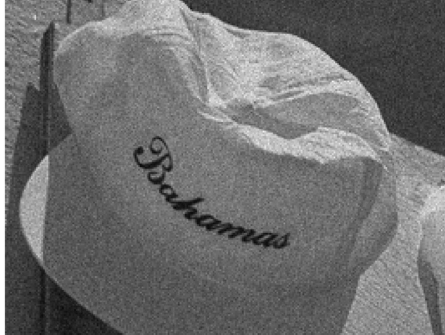

b

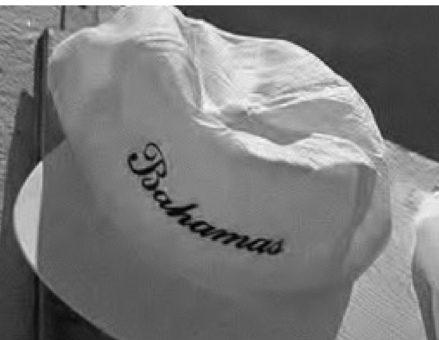

c

PSNR = 34.53; PSNR-HVS-M = 34.67;  
MSSIM = 0.956

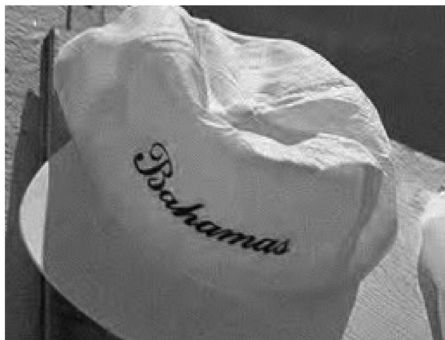

d

PSNR = 33.94; PSNR-HVS-M = 34.39;  
MSSIM = 0.952
