# Supplementary material for: On required accuracy of mixed noise parameter estimation for image enhancement via denoising
Source: Springer Nature journal article supplement (doi:10.1186/1687-5281-2014-3), 2014-01-14

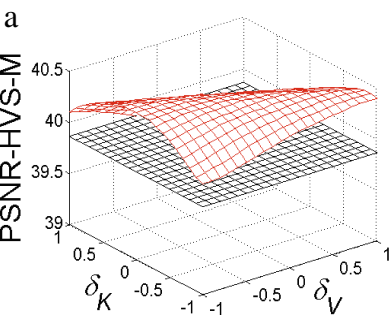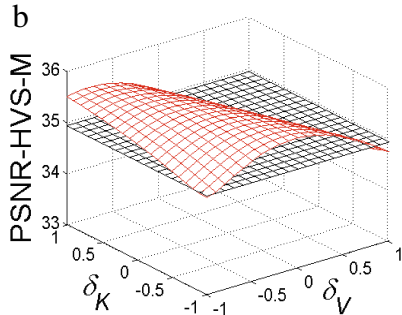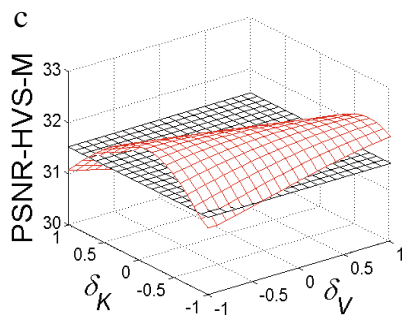

Supplement: 13640_2013_106_MOESM9_ESM.pdf [file 13640_2013_106_MOESM9_ESM.pdf]
